# Supplementary material
Source: PubMed Central journal article supplement (PMC3079173)
Supplement: Supp_Fig.pdf [file Supp_Fig.pdf]

## Supplementary Data

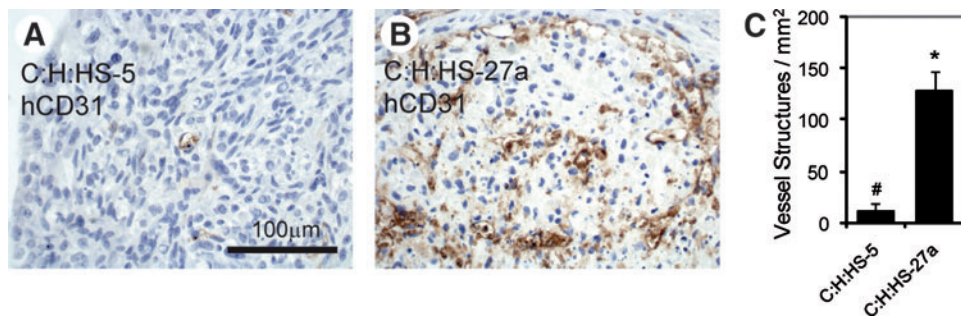

**SUPPLEMENTARY FIG. S1.** Endothelial cell networks depend on hMSC clone in tri-cell cardiac patches. An antibody against hCD31 marked endothelial cells (brown) at 8 days of *in vitro* culture for tri-cell patches with human embryonic stem cell-derived cardiomyocytes, HUVECs and either HS-5 hMSCs (A) or HS-27a hMSCs (B). Vessel structures are increased for patches with HS-27a hMSCs (C; \* $p < 0.05$  vs. Cardiac and C:HUVEC, see Fig. 1; # $p < 0.05$  vs. C:H:mouse embryonic fibroblast, see Fig. 1). hMSC, human marrow stromal cell; HUVEC, human umbilical vein endothelial cell.

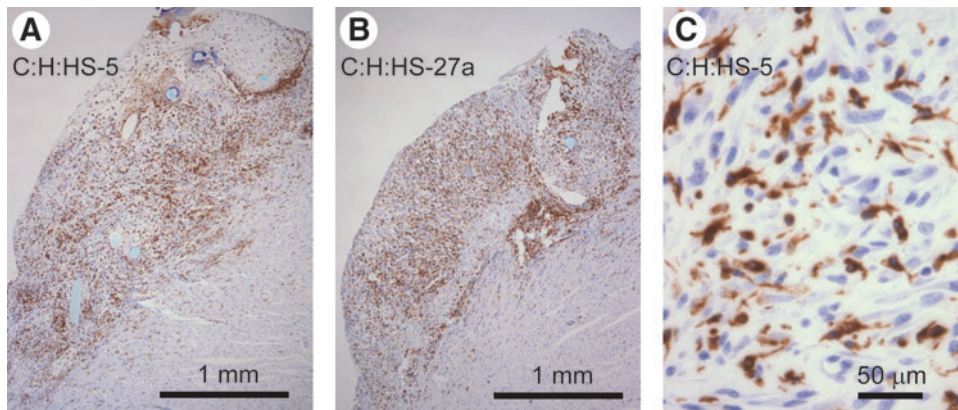

**SUPPLEMENTARY FIG. S2.** Macrophages infiltrate implanted cardiac patches. An antibody against rat CD68 marked macrophages (brown) in tri-cell cardiac patches with HS-5 hMSCs (A,C) or HS-27a hMSCs (B) implanted on the epicardial surface of an uninjured rat heart.
